# Supplementary material for: Peptide-derived gold nanoparticles as a promising delivery system for Src targeting siRNA in breast cancer cells
Source: Royal Society of Chemistry journal article supplement (doi:10.1039/d4pm00249k), 2025-01-01
Supplement: d4pm00249k1.pdf [file d4pm00249k1.pdf]

## **Supplementary Information**

### **Peptide-derived gold nanoparticles as promising delivery system for Src targeting siRNA in breast cancer cells**

Uday Suryakanta<sup>a</sup>, Bijayananda Panigrahi<sup>a,b</sup>, Sumana Pal<sup>a</sup>, Swatilekha Das<sup>a</sup>, Soumyadeep  
Biswas<sup>a</sup>, Dindyal Mandal<sup>a\*</sup>

<sup>a</sup> School of Biotechnology, KIIT deemed to be University, Bhubaneswar, Odisha 751024,  
India

<sup>b</sup> International Centre for Genetic Engineering and Biotechnology (ICGEB), Aruna Asaf Ali  
Marg, Vasant Kunj, 110067, New Delhi, India

#### **\*Corresponding Author**

Dr. Dindyal Mandal

School of Biotechnology,

Kalinga Institute of Industrial Technology

Deemed to be University,

Campus 11, Patia,

Bhubaneswar, Odisha, India 751024

Email: dmandal@kiitbiotech.ac.in

Ph: +91-674-2725466

Fax: +91-674-2725732

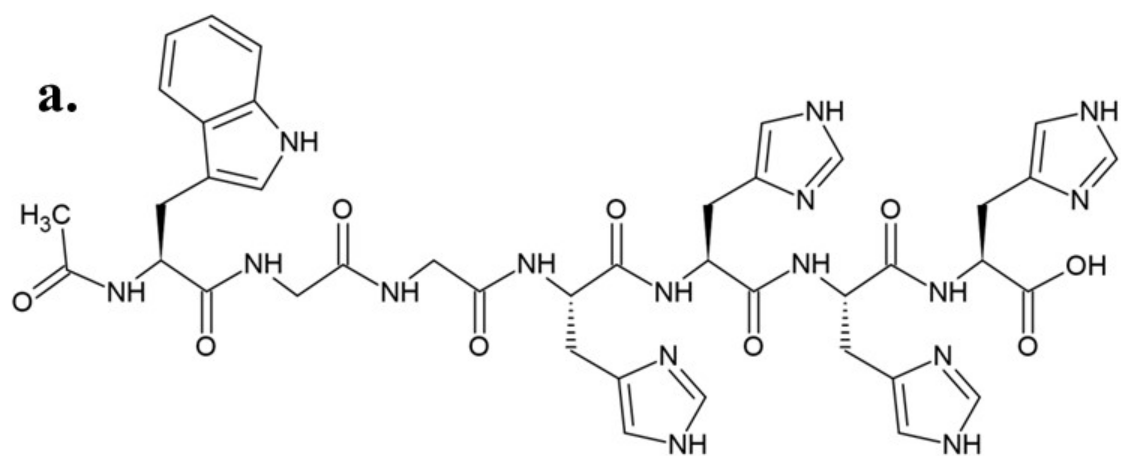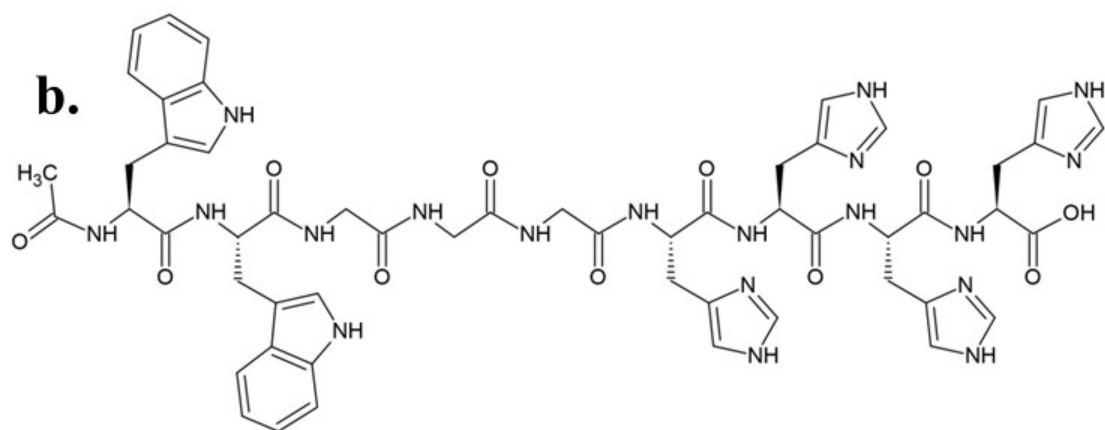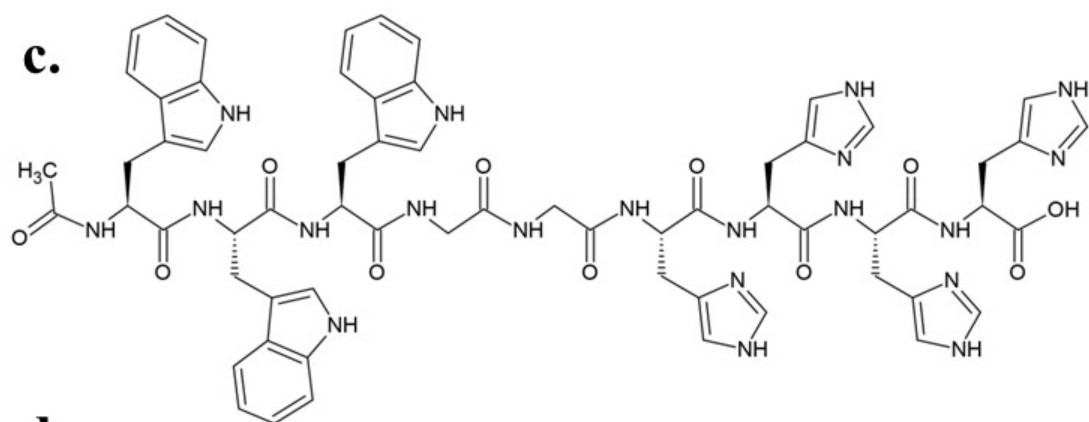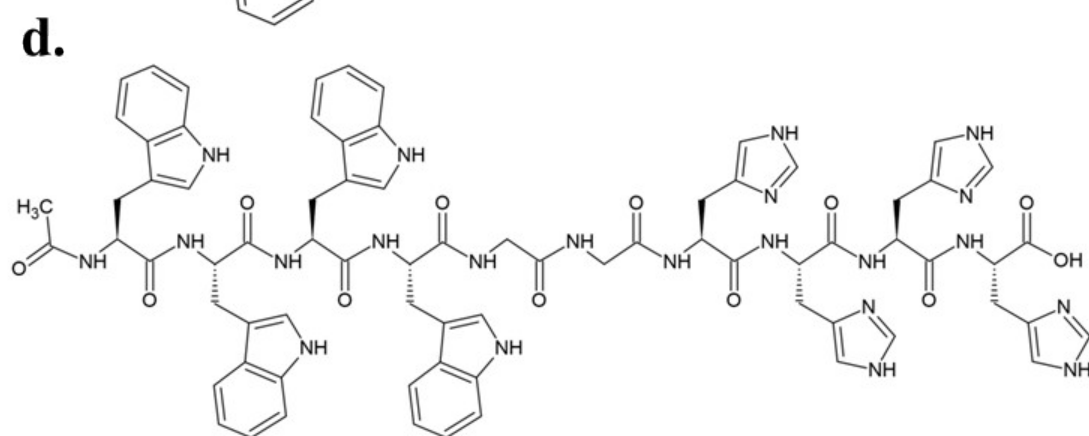

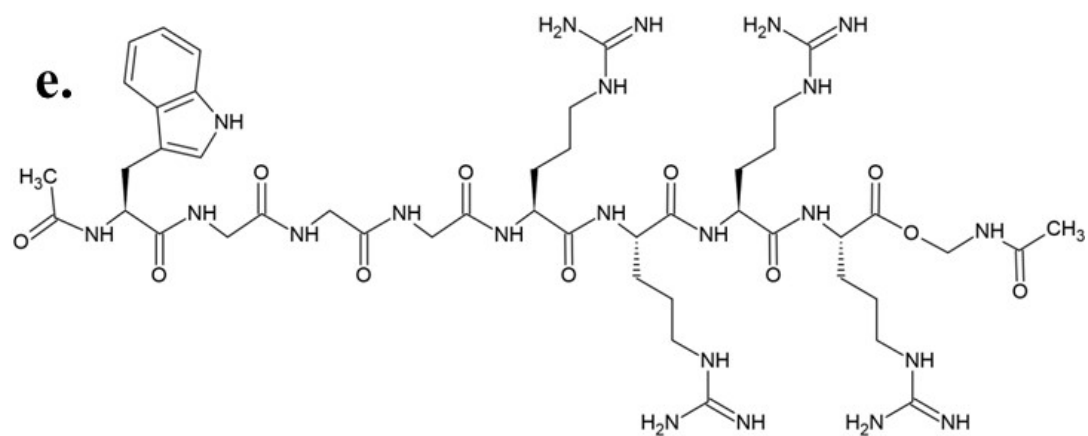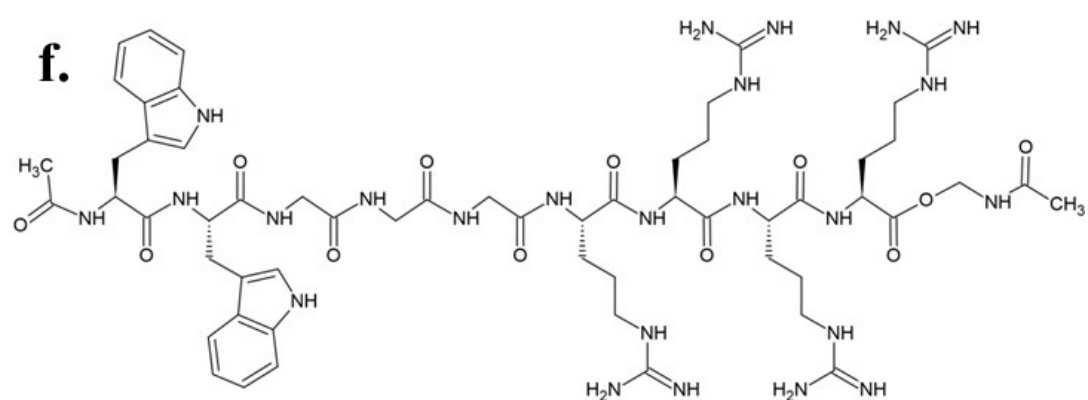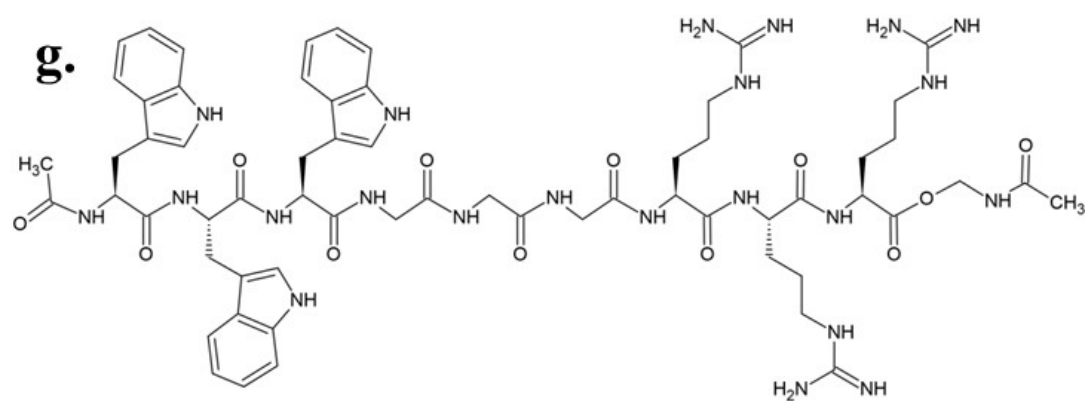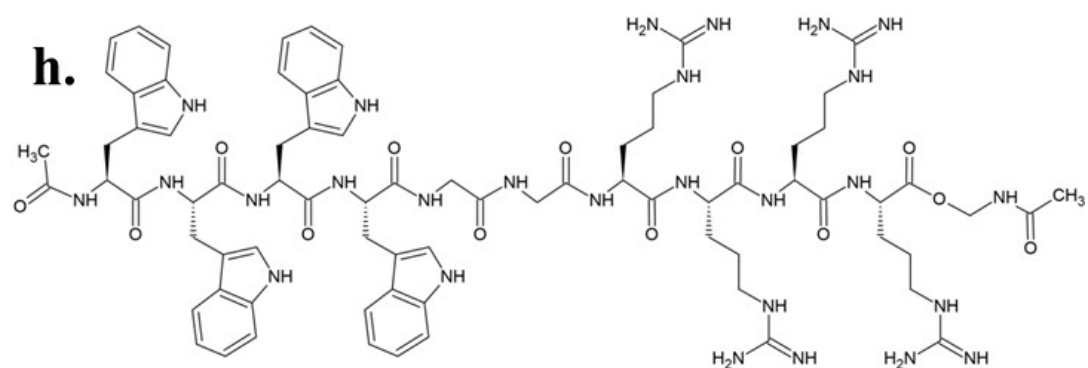

**Figure S 1: Structure of the synthesised peptides (a-d) WH series peptides, (e-h) WR series peptides**

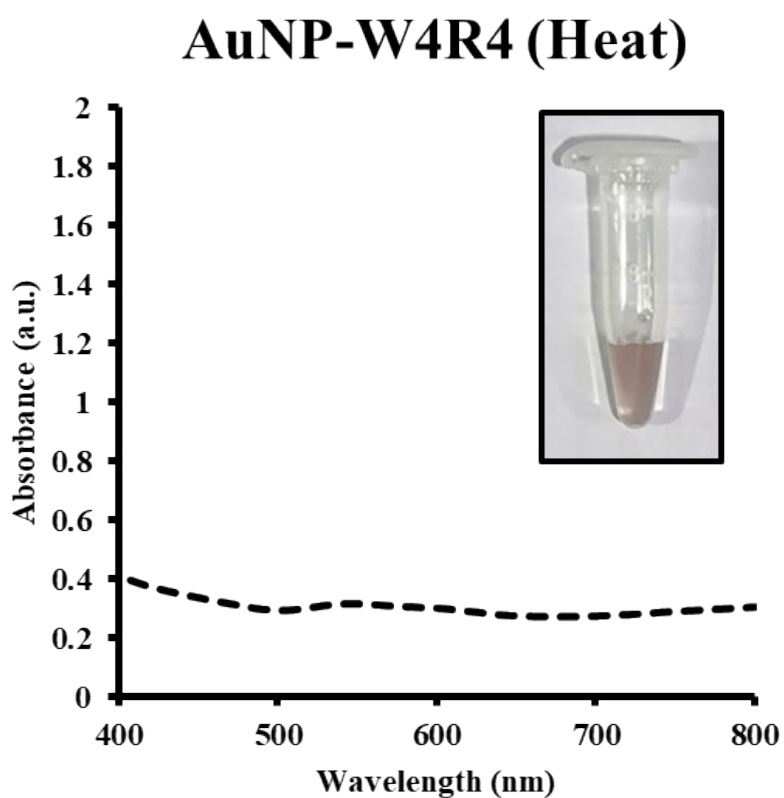

**Figure S 2: UV-visible spectra of synthesized gold particles with peptide W4R4 (Conditions: Temperature: 80°C & Ambient light)**

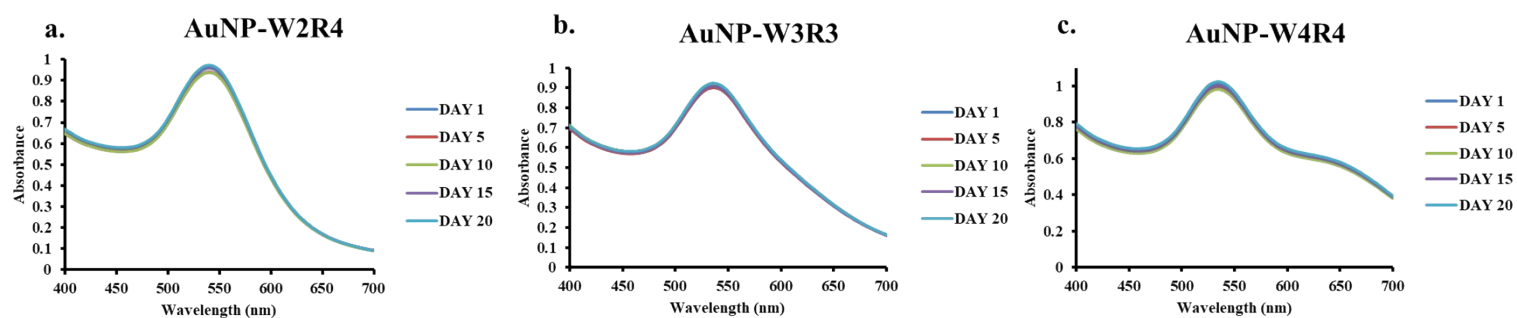

**Figure S 3: Stability analysis of gold nanoparticles (a.AuNP-W2R4; b.AuNP-W3R3 and c.AuNP-W4R4) from day 1 to day 20.**

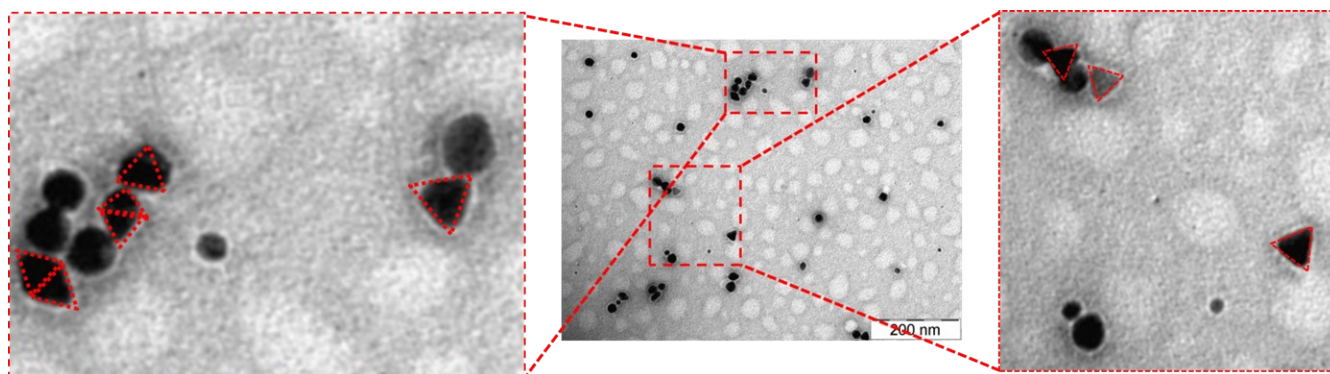

**Figure S 4: Enlarged image of TEM analysis for AuNP-W4R4 showcasing synthesised nanoparticles consist spherical and triangle shaped nanoparticles, Nano triangle justifying the UV-spectra result showing slight hump peak at 700 nm in case of AuNP-W4R4.**

a.

### Results

|                   | Size (d.nm) | % Intensity | St Dev (d.nm) |
|-------------------|-------------|-------------|---------------|
| Z-Average (d.nm): | 196.7       | 96.0        | 102.8         |
| Pdl:              | 0.410       | 4.0         | 554.8         |
| Intercept:        | 0.845       | 0.0         | 0.000         |
| Result quality    | Good        |             |               |

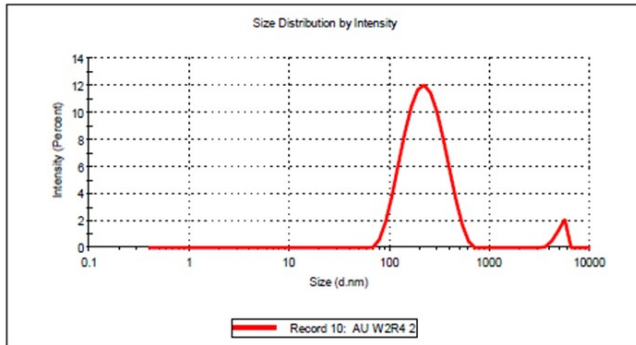

AuNP-W2R4

b.

### Results

|                   | Size (d.nm)             | % Intensity | St Dev (d.nm) |
|-------------------|-------------------------|-------------|---------------|
| Z-Average (d.nm): | 521.2                   | 100.0       | 120.4         |
| Pdl:              | 0.394                   | 0.0         | 0.000         |
| Intercept:        | 0.962                   | 0.0         | 0.000         |
| Result quality    | Refer to quality report |             |               |

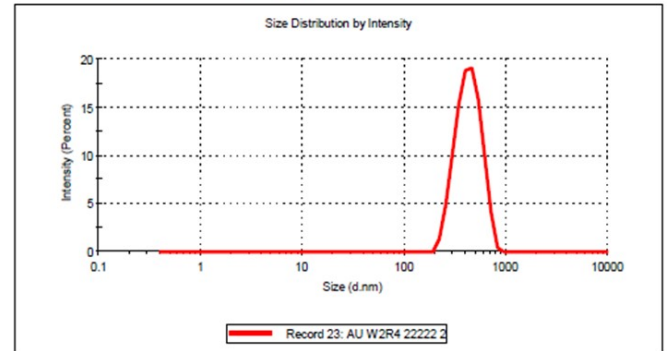

AuNP-W2R4 + siRNA

c.

### Results

|                   | Size (d.nm) | % Intensity | St Dev (d.nm) |
|-------------------|-------------|-------------|---------------|
| Z-Average (d.nm): | 76.72       | 91.0        | 64.26         |
| Pdl:              | 0.457       | 9.0         | 5.709         |
| Intercept:        | 0.823       | 0.0         | 0.000         |
| Result quality    | Good        |             |               |

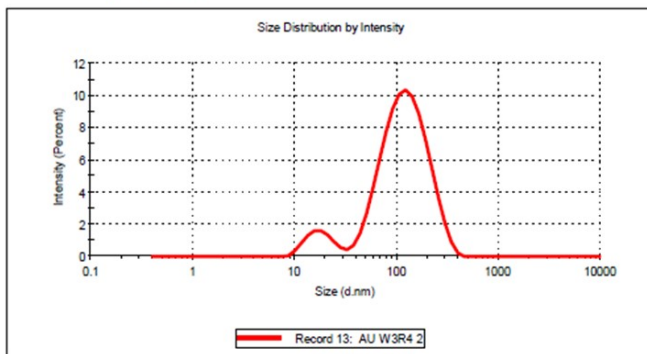

AuNP-W3R3

d.

### Results

|                   | Size (d.nm) | % Intensity | St Dev (d.nm) |
|-------------------|-------------|-------------|---------------|
| Z-Average (d.nm): | 151.0       | 96.4        | 93.92         |
| Pdl:              | 0.364       | 3.6         | 860.4         |
| Intercept:        | 0.885       | 0.0         | 0.000         |
| Result quality    | Good        |             |               |

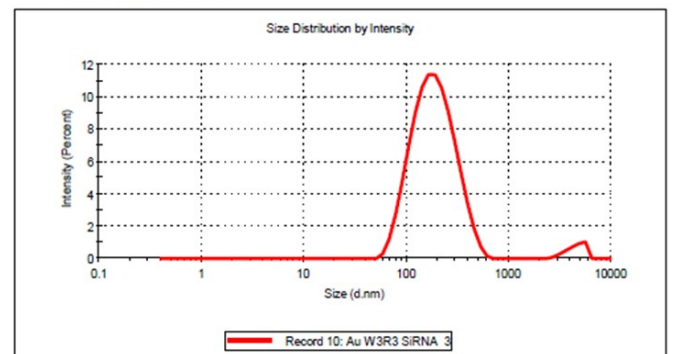

AuNP-W3R3 + siRNA

e.

Results

|                         | Size (d.n...            | % Intensity: | St Dev (d.n... |
|-------------------------|-------------------------|--------------|----------------|
| Z-Average (d.nm): 28.33 | Peak 1: 35.54           | 96.3         | 12.46          |
| Pdl: 0.348              | Peak 2: 4643            | 3.7          | 809.0          |
| Intercept: 0.894        | Peak 3: 0.000           | 0.0          | 0.000          |
| Result quality          | Refer to quality report |              |                |

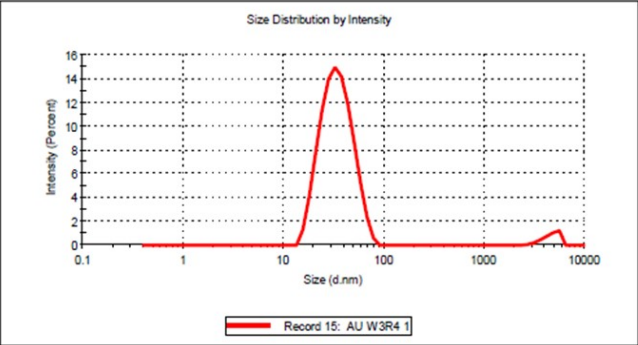

AuNP-W4R4

f.

Results

|                         | Size (d.n...            | % Intensity: | St Dev (d.n... |
|-------------------------|-------------------------|--------------|----------------|
| Z-Average (d.nm): 36.64 | Peak 1: 46.27           | 80.1         | 16.78          |
| Pdl: 0.430              | Peak 2: 1303            | 13.6         | 632.8          |
| Intercept: 0.914        | Peak 3: 5.940           | 6.3          | 0.8602         |
| Result quality          | Refer to quality report |              |                |

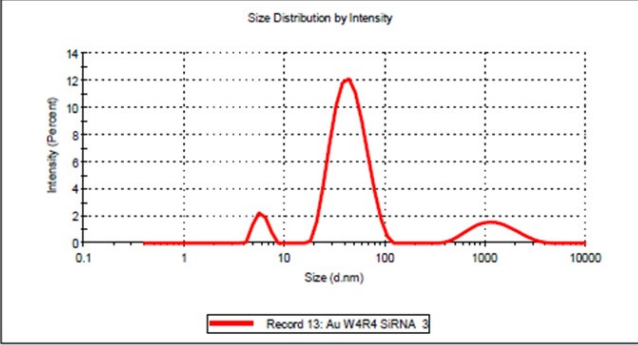

AuNP-W4R4+siRNA

Figure S 5: DLS (Dynamic light scattering) analysis: hydrodynamic size (d.nm) for synthesised materials Pep-AuNP (a,c,e) and complex (b,d,f).

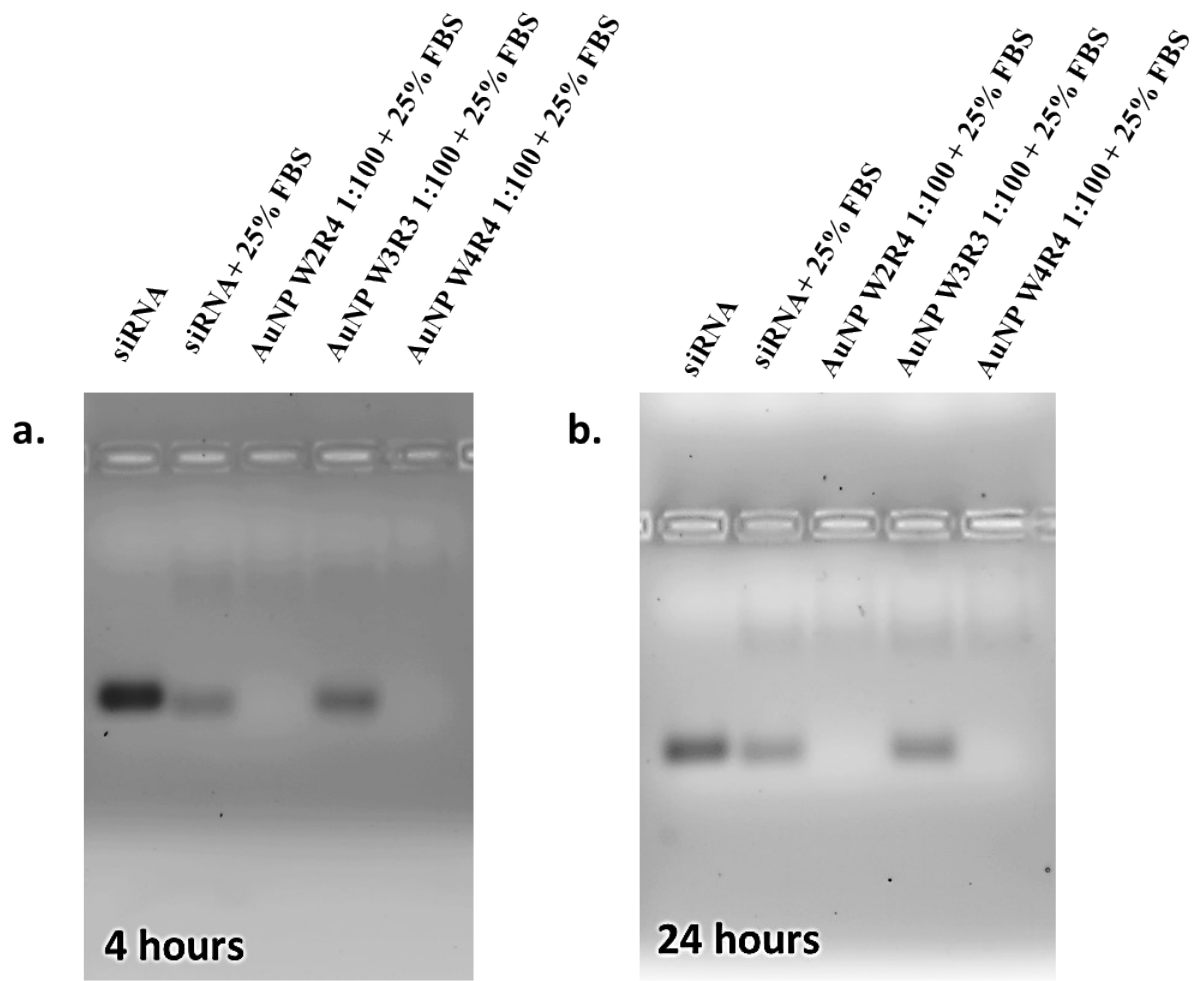

**Figure S 6: Gel retardation assay: serum stability of the complex in presence of 25% FBS (a) 4 hours incubation (b) 24 hours incubation was observed, siRNA band intensity indicated the instability of the complex in presence of serum.**

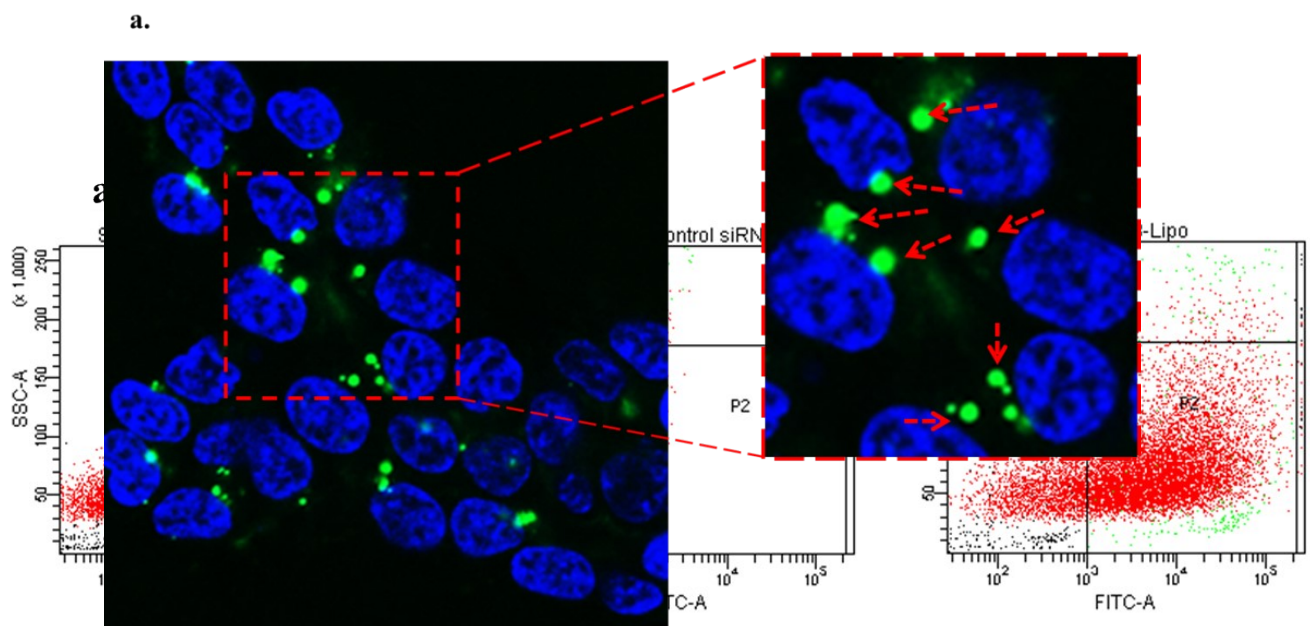

**b.**

**Figure S 7: Flow cytometry analysis of FAM-lipid complex stability in MCF 7 cells. (a) control cells b) FAM-siRNA and c) Lipid**

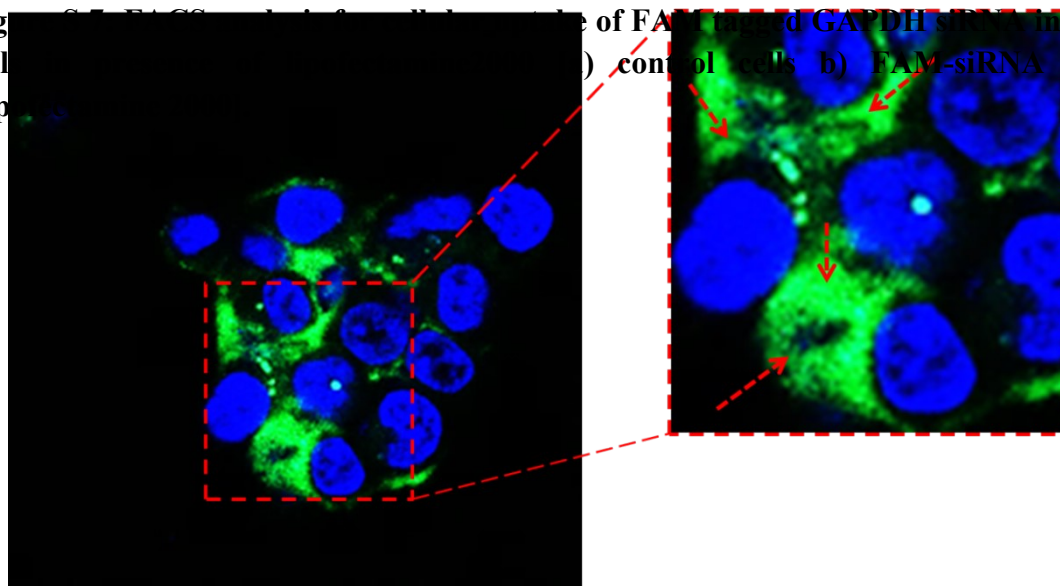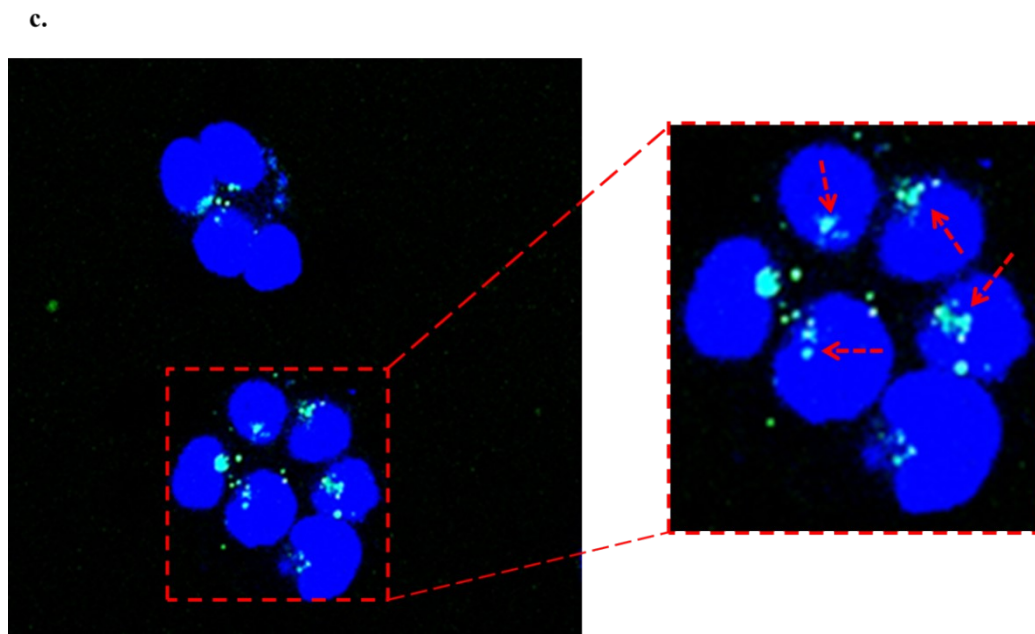

**Figure S 8: Magnified images confocal microscopy results for cellular uptake of FAM-GAPDH siRNA using (a) AuNP-W2R4, (b) AuNP-W3R3 and (c) AuNP-W4R4 in MCF 7 cell line.**

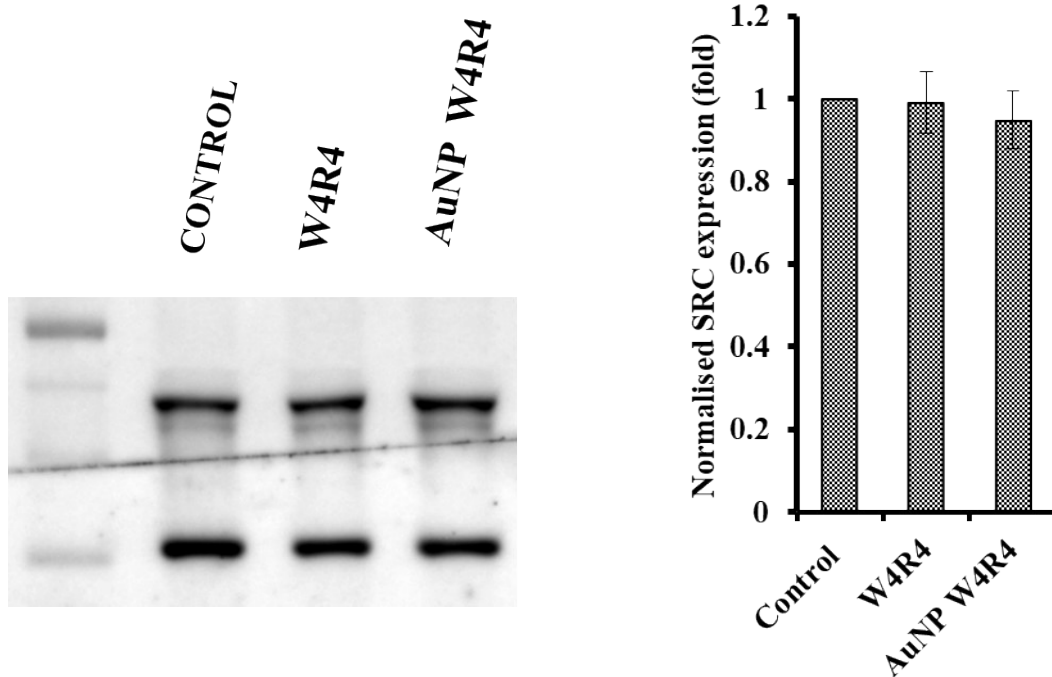

**Figure S 9: Western blotting analysis of src protein expression upon MCF 7 cells being treated with peptide W4R4 and AuNP-W4R4 for 48 hours, bar graphs represents the mean normalised intensity of src protein normalised against GAPDH protein using image j.**
